# Supplementary material
Source: Springer Nature journal article supplement (https://www.springermedizin.de/resource/supplementary/12916_2006_89_MOESM7_ESM.pdf/9599144)

# Proportion

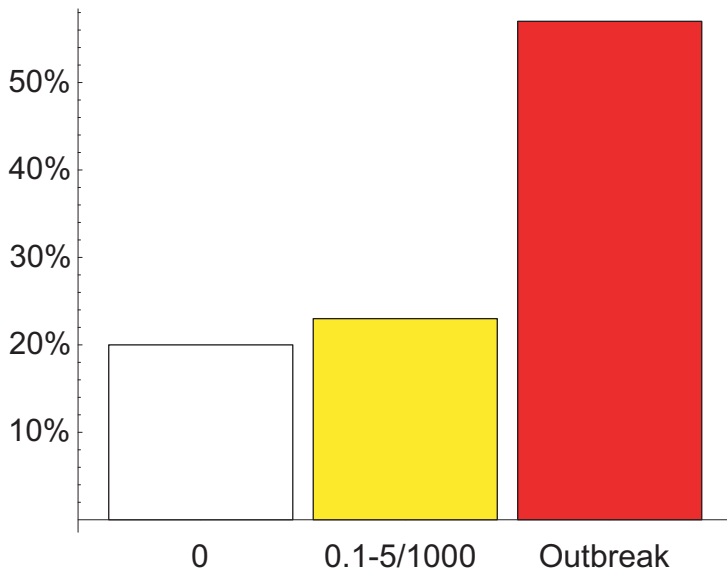

# Incidence of infections /10,000

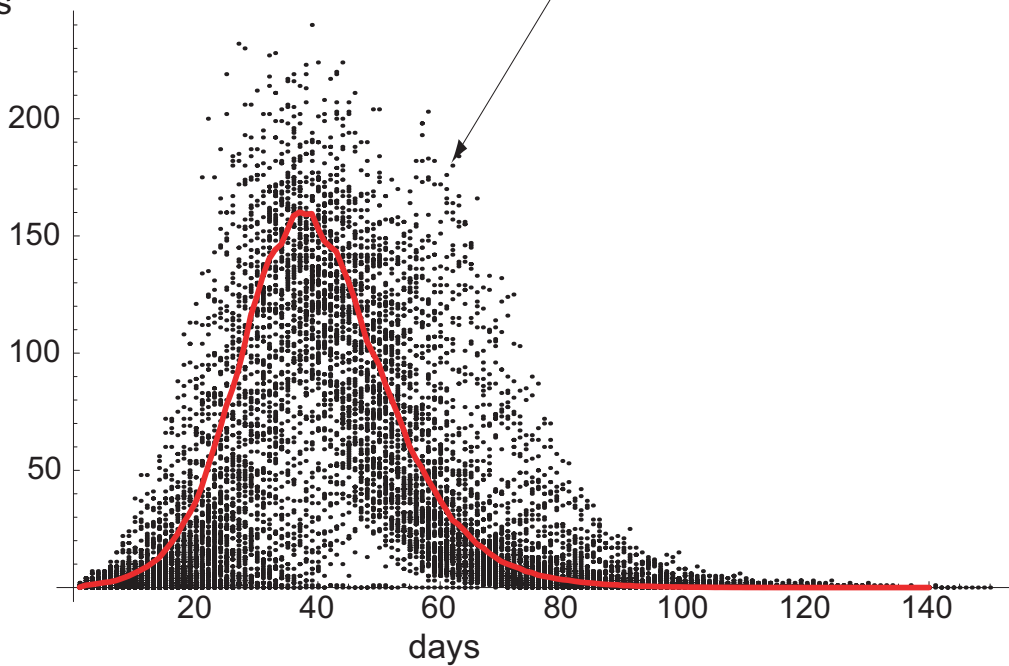

Supplement: MOESM7 [file 9599144]
